# Supplementary material for: SI epidemic model applied to COVID-19 data in mainland China
Source: PubMed Central journal article supplement (PMC7813244; doi:10.1098/rsos.201878), 2020-12-02
Supplement: rsos201878_review_history.pdf [file rsos201878_review_history.pdf]

## **SI epidemic model applied to COVID-19 data in mainland China**

J. Demongeot, Q. Griette and P. Magal

### **Article citation details**

*R. Soc. open sci.* 7: 201878.

<http://dx.doi.org/10.1098/rsos.201878>

### **Review timeline**

Original submission: 23 October 2020  
Final acceptance: 10 November 2020

Note: Reports are unedited and appear as submitted by the referee. The review history appears in chronological order.

## Review History

### Decision letter (RSOS-201878.R0)

We hope you are keeping well at this difficult and unusual time. We continue to value your support of the journal in these challenging circumstances. If Royal Society Open Science can assist you at all, please don't hesitate to let us know at the email address below.

Dear Dr Magal:

It is a pleasure to accept your manuscript entitled "SI epidemic model applied to COVID-19 data in mainland China" in its current form for publication in Royal Society Open Science. The comments of the reviewer(s) who reviewed your manuscript are included at the foot of this letter.

Please ensure that you send to the editorial office an editable version of your accepted manuscript, and individual files for each figure and table included in your manuscript. You can send these in a zip folder if more convenient. Failure to provide these files may delay the processing of your proof. You may disregard this request if you have already provided these files to the editorial office.

COVID-19 rapid publication process:

We are taking steps to expedite the publication of research relevant to the pandemic. If you wish, you can opt to have your paper published as soon as it is ready, rather than waiting for it to be published the scheduled Wednesday.

This means your paper will not be included in the weekly media round-up which the Society sends to journalists ahead of publication. However, it will still appear in the COVID-19 Publishing Collection which journalists will be directed to each week (<https://royalsocietypublishing.org/topic/special-collections/novel-coronavirus-outbreak>).

If you wish to have your paper considered for immediate publication, or to discuss further, please notify [openscience\\_proofs@royalsociety.org](mailto:openscience_proofs@royalsociety.org) and [press@royalsociety.org](mailto:press@royalsociety.org) when you respond to this email.

You can expect to receive a proof of your article in the near future. Please contact the editorial office ([openscience\\_proofs@royalsociety.org](mailto:openscience_proofs@royalsociety.org)) and the production office ([openscience@royalsociety.org](mailto:openscience@royalsociety.org)) to let us know if you are likely to be away from e-mail contact -- if you are going to be away, please nominate a co-author (if available) to manage the proofing process, and ensure they are copied into your email to the journal.

Due to rapid publication and an extremely tight schedule, if comments are not received, your paper may experience a delay in publication.

Please see the Royal Society Publishing guidance on how you may share your accepted author manuscript at <https://royalsociety.org/journals/ethics-policies/media-embargo/>.

Thank you for your fine contribution. On behalf of the Editors of Royal Society Open Science, we look forward to your continued contributions to the Journal.

Kind regards,  
Royal Society Open Science Editorial Office  
Royal Society Open Science  
[openscience@royalsociety.org](mailto:openscience@royalsociety.org)

on behalf of Dr Jianhong Wu (Associate Editor) and Dr Glenn Webb (Subject Editor).

Associate Editor Dr Jianhong Wu Comments to Author:

Associate Editor  
Comments to the Author:  
Congratulation for a fine piece of modelling work addressing a critical issue.

Some small editorial changes may be done during the production. This includes

1. Avoiding, in the abstract, direct reference to papers such as Liu et al [8]. This can be replaced by, for example, Liu et al. *Biology*, 2020.
2. Also, some minor changes can be made during proofreading, such as "methods" rather than "method" in the first sentence of the conclusion.
3. Finally, in the introduction, I would NOT say that virulence declines due to mutation. I would simply that virulence may change over time due to mutation.

Follow Royal Society Publishing on Twitter: @RSocPublishing

Follow Royal Society Publishing on Facebook:

<https://www.facebook.com/RoyalSocietyPublishing.FanPage/>

Read Royal Society Publishing's blog:

<https://royalsociety.org/blog/blogsearchpage/?category=Publishing>
